# Supplementary material for: Vascular, valvular and kidney calcification manifested in mouse models of adenine-induced chronic kidney disease
Source: PubMed Central journal article supplement — Ren Fail. 2023 Jun 27;45(1):2228920. doi: 10.1080/0886022X.2023.2228920 (PMC10304458; doi:10.1080/0886022x.2023.2228920), 2023-06-27
Supplement: IRNF_A_2228920_SM2623.pdf [file IRNF_A_2228920_SM2623.pdf]

## Characteristics of previous relevant studies about mouse model methods

| Reference number | Type     | Gender  | Inducement age (week) | Adenine (%) | Phosphorus (%) | Casein (%) | Inducement period | Additional intervention                                                                             | Probability of survival (%) | Success rate of model (%) |
|------------------|----------|---------|-----------------------|-------------|----------------|------------|-------------------|-----------------------------------------------------------------------------------------------------|-----------------------------|---------------------------|
| 16               | C57BL/6J | Male    | 8                     | 0.15-0.3    | 1.2            | 10         | 8                 | None                                                                                                | 80%                         | Unreported                |
| 18               | C57BL/6J | Male    | 14                    | 0.15-0.3    | 1.2            | Unreported | 8                 | None                                                                                                | Unreported                  | Unreported                |
| 18               | DBA/2J   | Male    | 14                    | 0.15-0.3    | 1.2            | Unreported | 8                 | None                                                                                                | Unreported                  | Unreported                |
| 34               | C57BL/6J | Male    | 8-10                  | 0.15-0.3    | Normal         | Unreported | 8                 | None                                                                                                | Unreported                  | Unreported                |
| 17,19            | C57BL/6J | Male    | 6                     | 0.25        | 1.8            | Unreported | 16-22             | (1) Calcium;<br>(2) Calcitriol                                                                      | Unreported                  | Unreported                |
| 29               | C57BL/6J | Male    | Unreported            | 0.25        | Normal         | Unreported | 5                 | None                                                                                                | Unreported                  | Unreported                |
| 32               | DBA/2    | Female  | 14                    | 0.25        | 2              | Unreported | 10                | (1) CaCO <sub>3</sub> ;<br>(2) Tempol<br>(3) Triptolide                                             | Unreported                  | Unreported                |
| 23               | C57BL/6J | Male    | 12-14                 | 0.2-0.25    | 1.8            | Unreported | 4                 | None                                                                                                | Unreported                  | Unreported                |
| 20               | C57BL/6J | Male    | 7                     | 0.2         | 0.3/0.6/1.2    | Unreported | 8                 | (1) Surgical left hemi-nephrectomy<br>(2) Lactose<br>(3) Magnesium<br>(4) Warfarin<br>(5) Vitamin D | Unreported                  | >80                       |
| 21               | C57BL/6J | Male    | 7                     | 0.2         | 1.2            | Unreported | 8                 | None                                                                                                | Unreported                  | Unreported                |
| 22               | C57BL/6J | Male    | 8-12                  | 0.2         | 1.8            | Unreported | 9                 | None                                                                                                | Unreported                  | Unreported                |
| 24               | C57BL/6J | Unknown | 8-10                  | 0.2         | 1.5            | Unreported | 16                | None                                                                                                | 40                          | Unreported                |
| 25               | C57BL/6J | Male    | 6                     | Unreported  | Normal         | Unreported | 5                 | Vitamin D                                                                                           | Unreported                  | Unreported                |
| 26               | C57BL/6J | Male    | 8                     | 0.2         | 1.8            | Unreported | 12                | None                                                                                                | 60                          | Unreported                |
| 27               | C57BL/6J | Male    | Unreported            | 0.2         | Normal         | Unreported | 4                 | None                                                                                                | Unreported                  | Unreported                |

---

|    |          |      |      |     |     |   |   |      |            |            |
|----|----------|------|------|-----|-----|---|---|------|------------|------------|
| 28 | C57BL/6J | Male | 8-10 | 0.2 | 1.2 | 5 | 8 | None | Unreported | Unreported |
|----|----------|------|------|-----|-----|---|---|------|------------|------------|

---

|    |            |            |   |     |       |            |     |      |            |            |
|----|------------|------------|---|-----|-------|------------|-----|------|------------|------------|
| 30 | Flox-Fgf23 | Unreported | 8 | 0.2 | 0.90% | Unreported | 4-8 | None | Unreported | Unreported |
|----|------------|------------|---|-----|-------|------------|-----|------|------------|------------|

---

|    |          |      |   |     |        |            |   |      |            |            |
|----|----------|------|---|-----|--------|------------|---|------|------------|------------|
| 31 | C57BL/6J | Male | 8 | 0.2 | Normal | Unreported | 4 | None | Unreported | Unreported |
|----|----------|------|---|-----|--------|------------|---|------|------------|------------|

---

|    |          |      |   |     |     |            |    |      |            |            |
|----|----------|------|---|-----|-----|------------|----|------|------------|------------|
| 33 | C57BL/6J | Male | 8 | 0.2 | 1.8 | Unreported | 12 | None | Unreported | Unreported |
|----|----------|------|---|-----|-----|------------|----|------|------------|------------|

---
