# Supplementary material for: Vascular, valvular and kidney calcification manifested in mouse models of adenine-induced chronic kidney disease
Source: PubMed Central journal article supplement — Ren Fail. 2023 Jun 27;45(1):2228920. doi: 10.1080/0886022X.2023.2228920 (PMC10304458; doi:10.1080/0886022x.2023.2228920), 2023-06-27
Supplement: IRNF_A_2228920_SM2730.pdf [file IRNF_A_2228920_SM2730.pdf]

## Recipe and nutritional ingredient of each feed

---

### 2-1: Principal raw material composition of basic feed

---

Corn  
 Wheat  
 Soybean meal  
 Fish meal  
 Chicken Powder  
 Mountain flour  
 Customized multivitamin  
 Animal fat  
 Sucrose  
 Calcium hydrogen carbonate  
 Salt  
 Calcium propionate  
 Lysine  
 Methionine  
 Taurine  
 Xylooligosaccharide  
 Ferrous sulfate  
 Customized microelement

---

*Notes: The ingredients were listed in descending order by mass*

---



---

### 2-2: The main energy materials and nutritional ingredient of basic feed

---

|                      |       |
|----------------------|-------|
| Carbohydrate, g/100g | 60.00 |
| Protein, g/100g      | 19.00 |
| Fat, g/100g          | 5.00  |
| Fiber, g/100g        | 3.00  |
| Calcium, g/100g      | 1.00  |
| Phosphorus, g/100g   | 0.78  |

---



---

### 2-3: Modified basic feed

---

| Raw material, g/100g            | Total         | Carbohydrate | Protein      | Fat          | Cellulose   | Calcium     | Phosphorus  |
|---------------------------------|---------------|--------------|--------------|--------------|-------------|-------------|-------------|
| Dietary compound feed           | 63.00         | 37.80        | 11.97        | 3.15         | 1.89        | 0.63        | 0.49        |
| Animal fat                      | 7.00          | 0.00         | 0.00         | 6.86         | 0.00        | 0.00        | 0.00        |
| Sucrose                         | 20.00         | 19.80        | 0.00         | 0.00         | 0.00        | 0.01        | 0.00        |
| Casein                          | 7.00          | 0.00         | 6.86         | 0.00         | 0.00        | 0.00        | 0.00        |
| Premix for experimental animals | 1.50          | 0.00         | 0.33         | 0.02         | 0.01        | 0.11        | 0.08        |
| Mountain flour                  | 0.50          | 0.00         | 0.00         | 0.00         | 0.00        | 0.19        | 0.00        |
| Calcium hydrogen phosphate      | 1.00          | 0.00         | 0.00         | 0.00         | 0.00        | 0.22        | 0.17        |
| <b>Total</b>                    | <b>100.00</b> | <b>57.60</b> | <b>19.16</b> | <b>10.03</b> | <b>1.90</b> | <b>1.16</b> | <b>0.74</b> |

---

| <b>2-4: Modified adenine feed</b> |               |                     |                |              |                  |                |                   |
|-----------------------------------|---------------|---------------------|----------------|--------------|------------------|----------------|-------------------|
| <b>Raw material, g/100g</b>       | <b>Total</b>  | <b>Carbohydrate</b> | <b>Protein</b> | <b>Fat</b>   | <b>Cellulose</b> | <b>Calcium</b> | <b>Phosphorus</b> |
| Dietary compound feed             | 62.80         | 37.68               | 11.93          | 3.14         | 1.88             | 0.63           | 0.49              |
| Animal fat                        | 7.00          | 0.00                | 0.00           | 6.86         | 0.00             | 0.00           | 0.00              |
| Sucrose                           | 20.00         | 19.80               | 0.00           | 0.00         | 0.00             | 0.00           | 0.00              |
| Casein                            | 7.00          | 0.00                | 6.86           | 0.00         | 0.00             | 0.00           | 0.00              |
| Premix for experimental animals   | 1.50          | 0.00                | 0.33           | 0.02         | 0.01             | 0.11           | 0.08              |
| Mountain flour                    | 0.50          | 0.00                | 0.00           | 0.00         | 0.00             | 0.19           | 0.00              |
| Calcium hydrogen phosphate        | 1.00          | 0.00                | 0.00           | 0.00         | 0.00             | 0.22           | 0.17              |
| Adenine                           | 0.20          | 0.00                | 0.00           | 0.00         | 0.00             | 0.00           | 0.00              |
| <b>Total</b>                      | <b>100.00</b> | <b>57.48</b>        | <b>19.12</b>   | <b>10.02</b> | <b>1.89</b>      | <b>1.15</b>    | <b>0.74</b>       |

| <b>2-5: Modified high-phosphorus feed</b> |               |                     |                |              |                  |                |                   |
|-------------------------------------------|---------------|---------------------|----------------|--------------|------------------|----------------|-------------------|
| <b>Raw material, g/100g</b>               | <b>Total</b>  | <b>Carbohydrate</b> | <b>Protein</b> | <b>Fat</b>   | <b>Cellulose</b> | <b>Calcium</b> | <b>Phosphorus</b> |
| Dietary compound feed                     | 57.20         | 34.32               | 10.87          | 2.86         | 1.72             | 0.57           | 0.45              |
| Animal fat                                | 7.50          | 0.00                | 0.00           | 7.35         | 0.00             | 0.00           | 0.00              |
| Sucrose                                   | 20.00         | 19.80               | 0.00           | 0.00         | 0.00             | 0.01           | 0.00              |
| Casein                                    | 8.00          | 0.00                | 7.84           | 0.00         | 0.00             | 0.00           | 0.00              |
| Premix for experimental animals           | 1.50          | 0.00                | 0.33           | 0.02         | 0.01             | 0.11           | 0.08              |
| Mountain flour                            | 0.50          | 0.00                | 0.00           | 0.00         | 0.00             | 0.19           | 0.00              |
| Calcium hydrogen phosphate                | 1.00          | 0.00                | 0.00           | 0.00         | 0.00             | 0.22           | 0.17              |
| Sodium dihydrogen phosphate               | 4.30          | 0.00                | 0.00           | 0.00         | 0.00             | 0.00           | 1.11              |
| <b>Total</b>                              | <b>100.00</b> | <b>54.12</b>        | <b>19.04</b>   | <b>10.23</b> | <b>1.73</b>      | <b>1.10</b>    | <b>1.81</b>       |

| <b>2-6: Modified adenine and high-phosphorus feed</b> |               |                     |                |              |                  |                |                   |
|-------------------------------------------------------|---------------|---------------------|----------------|--------------|------------------|----------------|-------------------|
| <b>Raw material, g/100g</b>                           | <b>Total</b>  | <b>Carbohydrate</b> | <b>Protein</b> | <b>Fat</b>   | <b>Cellulose</b> | <b>Calcium</b> | <b>Phosphorus</b> |
| Dietary compound feed                                 | 57.00         | 34.20               | 10.83          | 2.85         | 1.71             | 0.57           | 0.44              |
| Animal fat                                            | 7.50          | 0.00                | 0.00           | 7.35         | 0.00             | 0.00           | 0.00              |
| Sucrose                                               | 20.00         | 19.80               | 0.00           | 0.00         | 0.00             | 0.01           | 0.00              |
| Casein                                                | 8.00          | 0.00                | 7.84           | 0.00         | 0.00             | 0.00           | 0.00              |
| Premix for experimental animals                       | 1.50          | 0.00                | 0.33           | 0.02         | 0.01             | 0.11           | 0.08              |
| Mountain flour                                        | 0.50          | 0.00                | 0.00           | 0.00         | 0.00             | 0.19           | 0.00              |
| Calcium hydrogen phosphate                            | 1.00          | 0.00                | 0.00           | 0.00         | 0.00             | 0.22           | 0.17              |
| Sodium dihydrogen phosphate                           | 4.30          | 0.00                | 0.00           | 0.00         | 0.00             | 0.00           | 1.11              |
| Adenine                                               | 0.20          | 0.00                | 0.00           | 0.00         | 0.00             | 0.00           | 0.00              |
| <b>Total</b>                                          | <b>100.00</b> | <b>54.00</b>        | <b>19.00</b>   | <b>10.22</b> | <b>1.72</b>      | <b>1.10</b>    | <b>1.81</b>       |
